# Supplementary material for: Sustainable Actinomycete Biofilters Enable Optimized Phenol Removal and Agricultural Reuse of Olive Mill Wastewater within a Circular Economy Framework
Source: Research Square preprint supplement (doi:10.21203/rs.3.rs-7789590/v1), 2025-11-03
Supplement: Supplementary file 1 [file e9275fa835b73e7d4bf866f6.docx]

**Sustainable Actinomycete Biofilters Enable Optimized Phenol Removal and Agricultural Reuse of Olive Mill Wastewater within a Circular Economy Framework**

Omnia Alshamy1, Sameh M. Mustafa1, Alaaeldin Rashad1, Amal A. Hassan1, Abeer El Shahawy2, Sahar Ahmed El-Shatoury1 and Hesham Abdullah1

1Botany and Microbiology Dept, Suez Canal University, 41522 Ismailia, Egypt

2Department of Civil Engineering, Faculty of Engineering, Suez Canal University, P.O. Box 41522, Ismailia, Egypt

**
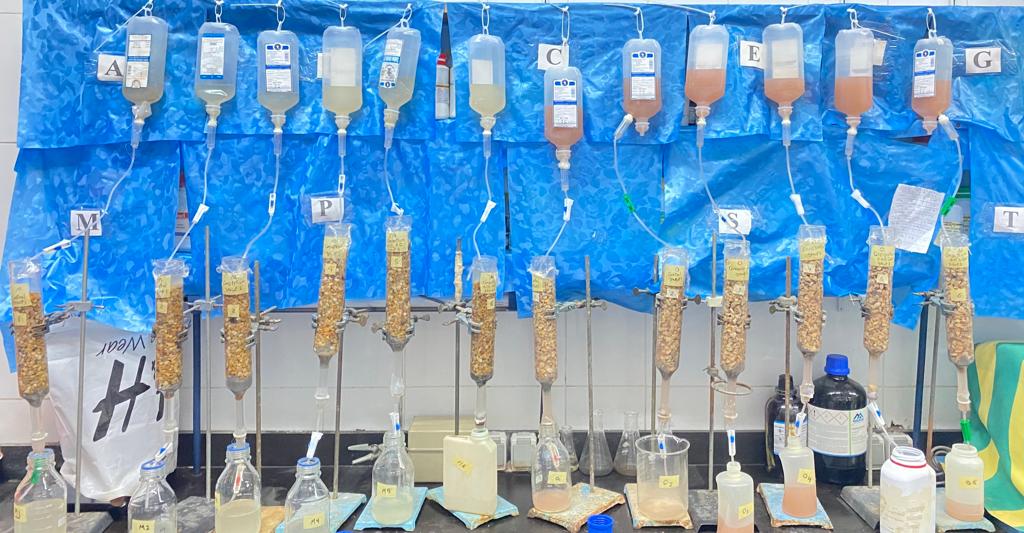
**

**Figure S1.** Experimental setup of percolating microcosms for olive mill wastewater treatment. The system consists of vertically arranged glass columns packed with supporting material and connected to influent reservoirs (top row) delivering raw wastewater and treatments (with/without casein or activated carbon) to the microcosm columns, under controlled flow. Effluents were collected at the bottom for subsequent analysis.
